# Supplementary material for: Spatial organization of translation and translational repression in two phases of germ granules
Source: PubMed Central journal article supplement — Nat Commun. 2024 Sep 13;15:8020. doi: 10.1038/s41467-024-52346-x (PMC11399267; doi:10.1038/s41467-024-52346-x), 2024-09-13
Supplement: 41467_2024_52346_MOESM1_ESM.pdf [file 41467_2024_52346_MOESM1_ESM.pdf]

# **Spatial organization of translation and translational repression in two phases of germ granules**

Anne Ramat†\*, Ali Haidar†, Céline Garret, Martine Simonelig\*

\*Corresponding authors: Martine.Simonelig@igh.cnrs.fr; Anne.Ramat@igh.cnrs.fr

## **Supplementary Information**

### **The PDF file includes:**

Supplementary Figures 1 to 9

Supplementary Note

Supplementary Tables 1 to 5

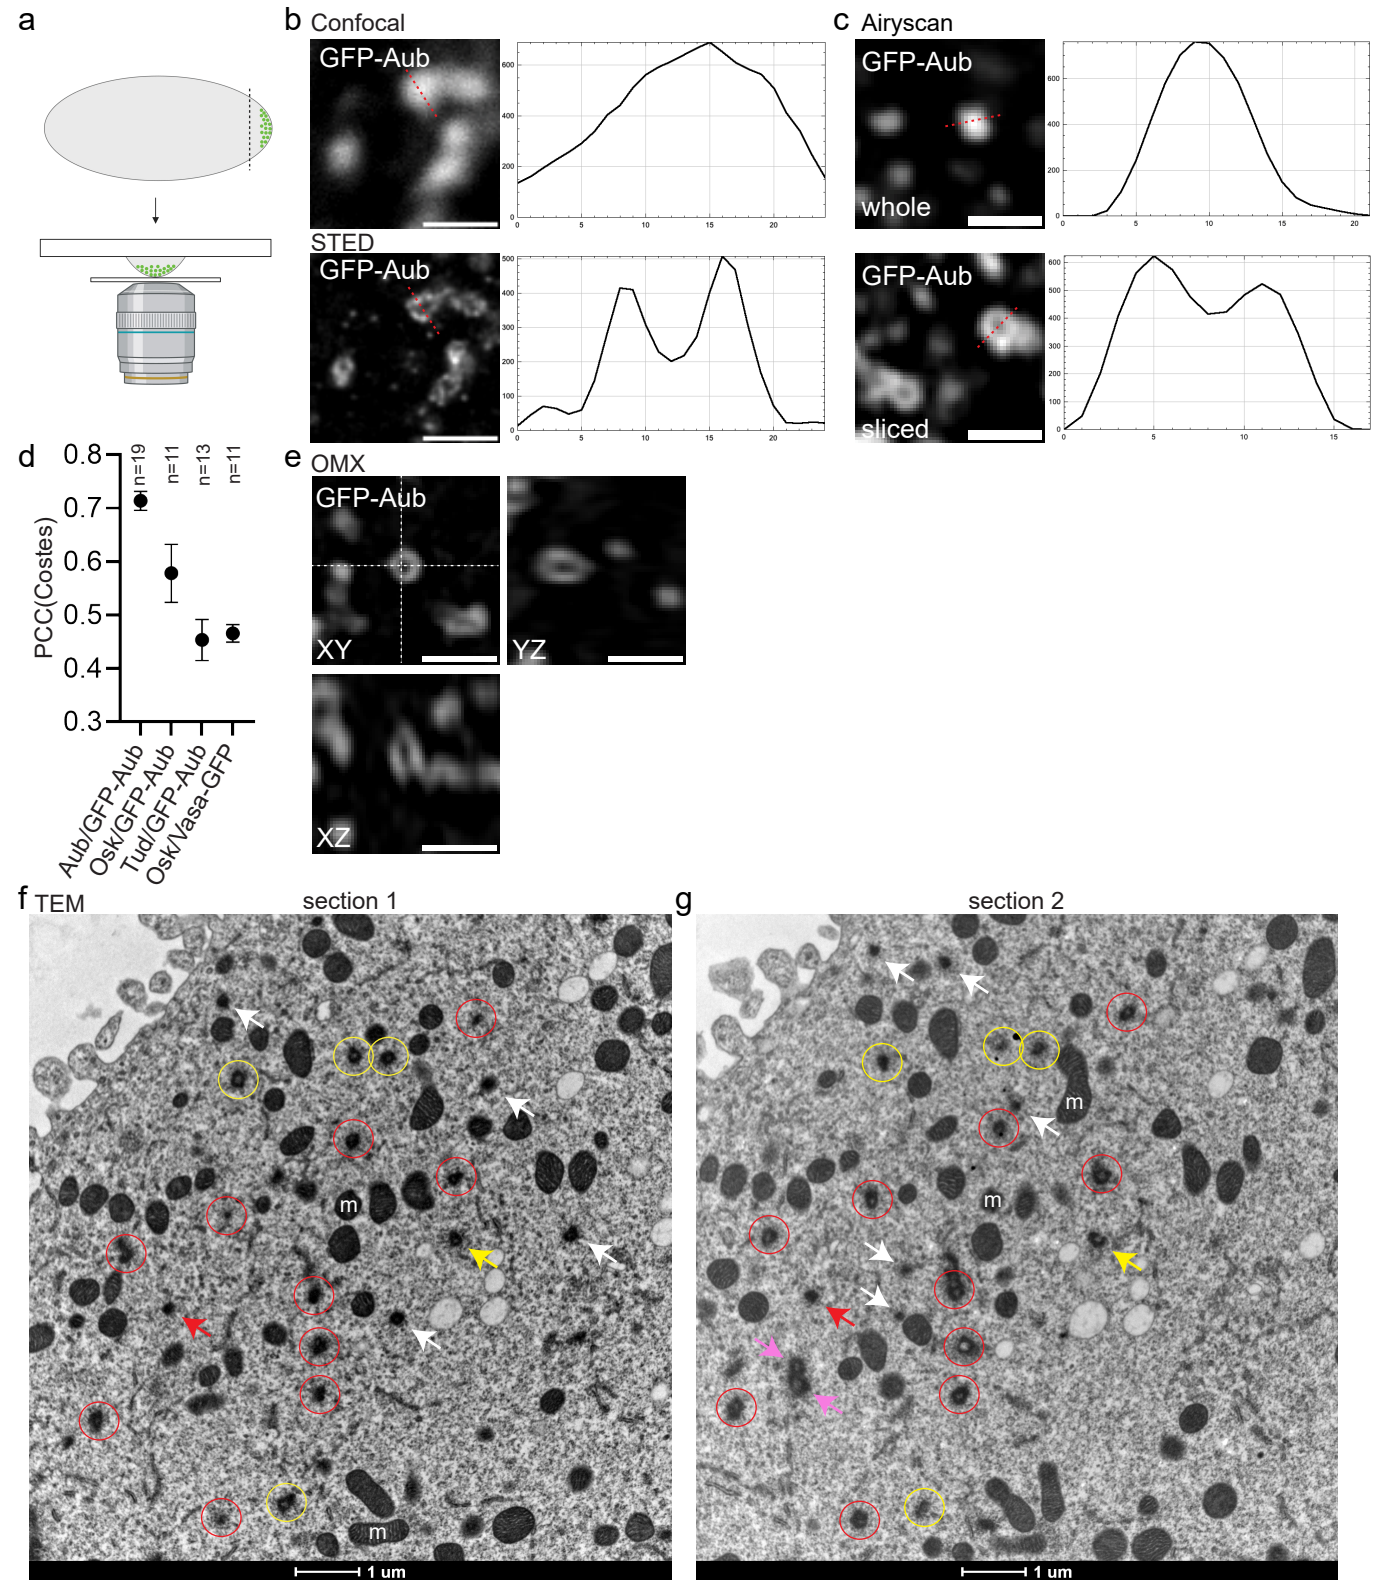

**Supplementary Figure 1/ Biphasic organization of *Drosophila* germ granules visualized with three super-resolution microscopy techniques.** **a**, Illustration of the mounting of the embryo posterior following slicing. Created with BioRender.com **b**, Immunostaining of *UASp-GFP-Aub; nos-Gal4* embryos with anti-GFP antibody, showing the same germ granules imaged using confocal (top) or STED super-resolution (bottom) microscopy. Fluorescence intensity (right) was recorded along the path marked with a red line. **c**, Airyscan imaging of *UASp-GFP-Aub; nos-Gal4* embryos in whole mount (top) or as a sliced posterior pole (bottom). Fluorescence intensity (right) was recorded along the path marked with a red line. GFP fluorescence was directly recorded without antibody staining. **d**, Quantification of colocalization between the indicated components shown in Fig. 1a, using PCC(Costes). Black circles represent the mean and error bars represent SEM. The number of embryos is indicated (n). **e**, 3D-OMX imaging of an *UASp-GFP-Aub; nos-Gal4* sliced posterior pole. YZ and XZ show the orthogonal views of the acquisition. GFP fluorescence was directly recorded without antibody staining. **f**, **g**, Electron micrographs of consecutive ultra-thin sections of the same germ plasm. Yellow circles indicate germ granules that are hollow in section 1 and full in section 2. Red circles indicate germ granules that are full in section 1 and hollow in section 2. The red arrow indicates a germ granule full in both sections. The yellow arrow indicates a germ granule hollow in both sections. White arrows indicate full germ granules present in one section only. Pink arrows indicate hollow germ granules present in one section only. m indicate examples of mitochondria. Scale bars: 1  $\mu$ m. Source data are provided as a Source Data file.

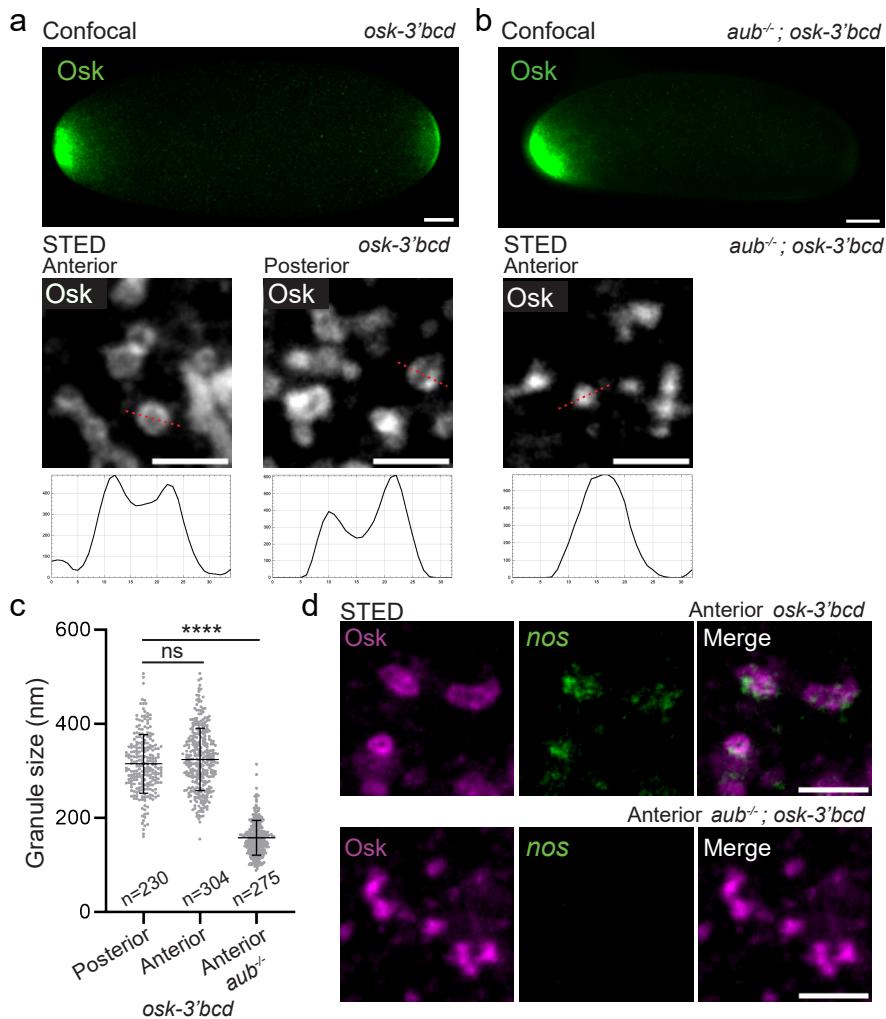

**Supplementary Figure 2/ Defective germ granule organization in the absence of Aub.** **a**, Immunostaining of *UASp-osk-bcd3'UTR/nos-Gal4* (*osk-3'bcd*) embryos with anti-Osk antibody showing Osk protein localization at both poles using confocal microscopy (top). *osk-bcd3'UTR* chimeric mRNA is recruited to the embryo anterior pole due to the presence of *bicoid* (*bcd*) 3'UTR. Visualization of germ granule organization using STED microscopy (bottom) showing that both anterior and posterior germ granules are biphasic. Fluorescence intensity was recorded along the path marked with a red dotted line. **b**, Immunostaining of *aub<sup>QC42/HN2</sup>; UASp-osk-bcd3'UTR/nos-Gal4* (*aub<sup>-/-</sup>; osk-3'bcd*) embryos with anti-Osk antibody showing Osk protein localization only at the anterior pole using confocal microscopy (top). Visualization of germ granule organization using STED microscopy (bottom) showing the loss of germ granule biphasic structure. Fluorescence intensity was recorded along the path marked with a red dotted line. **c**, Quantification of germ granule size in *UASp-osk-bcd3'UTR/nos-Gal4* (*osk-3'bcd* Posterior and Anterior) and *aub<sup>QC42/HN2</sup>; UASp-osk-bcd3'UTR/nos-Gal4* (Anterior *aub<sup>-/-</sup>*) embryos. Horizontal bars represent the mean and SD. ns: non-significant, \*\*\*\*  $p < 0.0001$  using the unpaired two-tailed Student's t-test.  $p = 0.1$  between anterior and posterior granules in *osk-3'bcd* embryos;  $p = 2.9 \times 10^{-137}$  between posterior granules in *osk-3'bcd* embryos and anterior granules in *aub<sup>-/-</sup>; osk-3'bcd* embryos;  $p = 1.2 \times 10^{-153}$  between anterior granules in *osk-3'bcd* embryos and anterior granules in *aub<sup>-/-</sup>; osk-3'bcd* embryos. The number of granules is indicated (n). **d**, STED imaging of immuno-smFISH of *UASp-osk-bcd3'UTR/nos-Gal4* (*osk-3'bcd*) and *aub<sup>QC42/HN2</sup>; UASp-osk-bcd3'UTR/nos-Gal4* (*aub<sup>-/-</sup>; osk-3'bcd*) embryos with anti-Osk antibody (magenta) and *nos* smFISH probe (green) showing the lack of *nos* mRNA in germ granules from *aub<sup>QC42/HN2</sup>* mutant embryos. Scale bars: 50  $\mu$ m in (a, b, top), 1  $\mu$ m in (a, b, bottom and d). Source data are provided as a Source Data file.

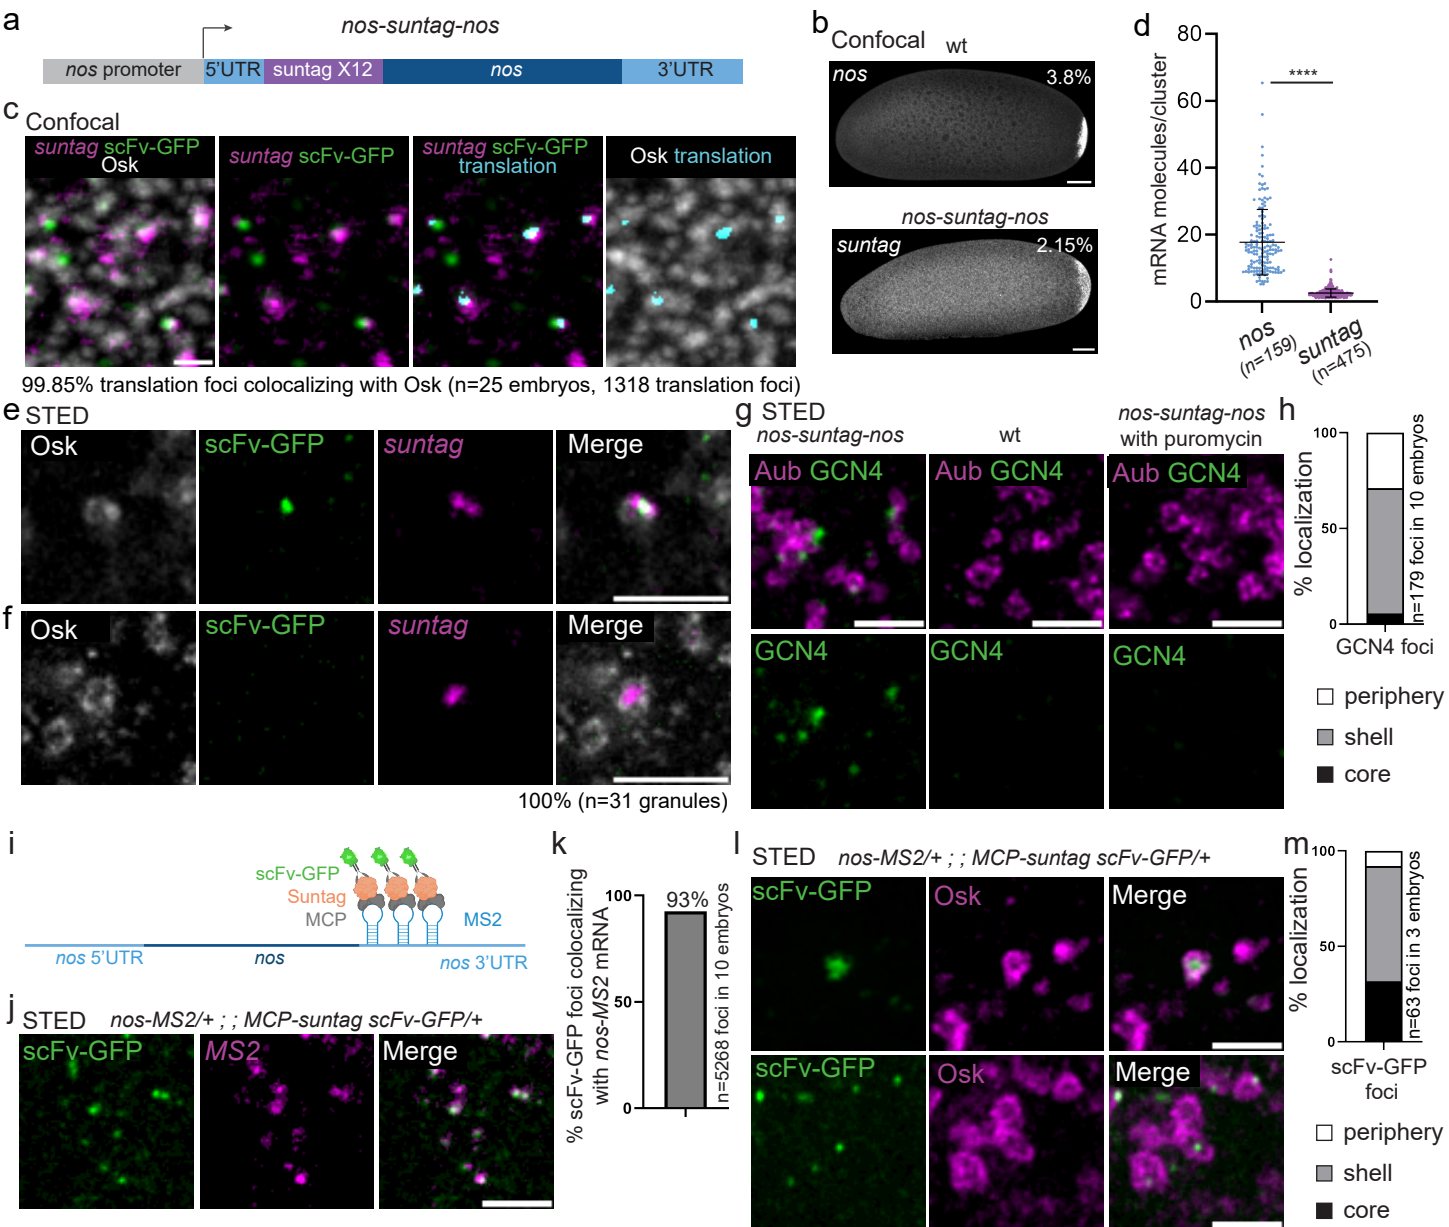

**Supplementary Figure 3/ Visualization of *nos* translation at germ granules using *suntag-nos*.** **a**, Schematic representation of the *nos-suntag-nos* construct. **b**, Z-projection of confocal images of smFISH on wild-type (top) and *suntag-nos/+* (bottom) embryos hybridized with *nos* and *suntag* probes, respectively. The corrected total fluorescence intensity at the posterior pole and in the whole embryo was measured to assess the percentage of mRNA localized at the posterior pole. **c**, Immuno-smFISH of *nos-suntag-nos/+ ; nos-scFv-GFP/+* embryos with anti-Osk antibody (grey), anti-GFP (green) nanobody to reveal scFv-GFP, and smFISH *suntag* probes (magenta). Colocalization of *suntag* and scFv-GFP signals (cyan) indicates ongoing *suntag-nos* translation. **d**, Quantification using FISH-quant of the number of *nos* and *suntag-nos* mRNA molecules per cluster at the posterior pole from confocal images of smFISH on wild-type and *nos-suntag-nos* embryos, respectively. Horizontal bars represent the mean and SD. \*\*\*\*  $p < 0.0001$  using the unpaired two-tailed Student's t-test.  $p = 2.1 \times 10^{-139}$ . The number of mRNA clusters is indicated (n). **e**, **f**, Three-color STED imaging of immuno-smFISH of *nos-suntag-nos/+ ; nos-scFv-GFP/+* embryos with anti-Osk antibody (grey), anti-GFP nanobody (green) to reveal scFv-GFP and smFISH *suntag* probes (magenta). **g**, STED imaging of *nos-suntag-nos/+* (left), wild-type (middle) and *nos-suntag-nos/+* treated with puromycin (right) embryos immunostained with anti-Aub (magenta) and anti-GCN4 (green) antibodies. **h**, Percentage of GCN4 foci localized in the core (black), in the shell (grey) and at the immediate periphery (white) of germ granules from images of *nos-suntag-nos/+* embryos as shown in (**g**). **i**, Illustration of the *nos-MS2/MCP-Suntag* system to localize scFv-GFP to the core of germ granule. Created with BioRender.com (**j**) Immuno-smFISH of *nos-MS2/+ ; nos-MCP-suntag nos-scFv-GFP/+* embryos with anti-GFP (green) to reveal scFv-GFP and smFISH *MS2* probes (magenta). **k**, Percentage of scFv-GFP foci colocalizing with *nos-MS2* mRNA obtained from images as in (**j**). (**l**) STED imaging of *nos-MS2/+ ; nos-MCP-suntag nos-scFv-GFP/+* embryos immunostained with anti-Osk antibody (magenta) and anti-GFP nanobody (green) to reveal scFv-GFP. (**m**) Percentage of scFv-GFP foci localized in the core (black), in the shell (grey) and at the immediate periphery (white) of germ granules obtained from images as shown in (**l**). Scale bars: 50  $\mu$ m in (**b**), 1  $\mu$ m in (**c**, **e**, **f**, **g**, **j**, **l**). Source data are provided as a Source Data file.

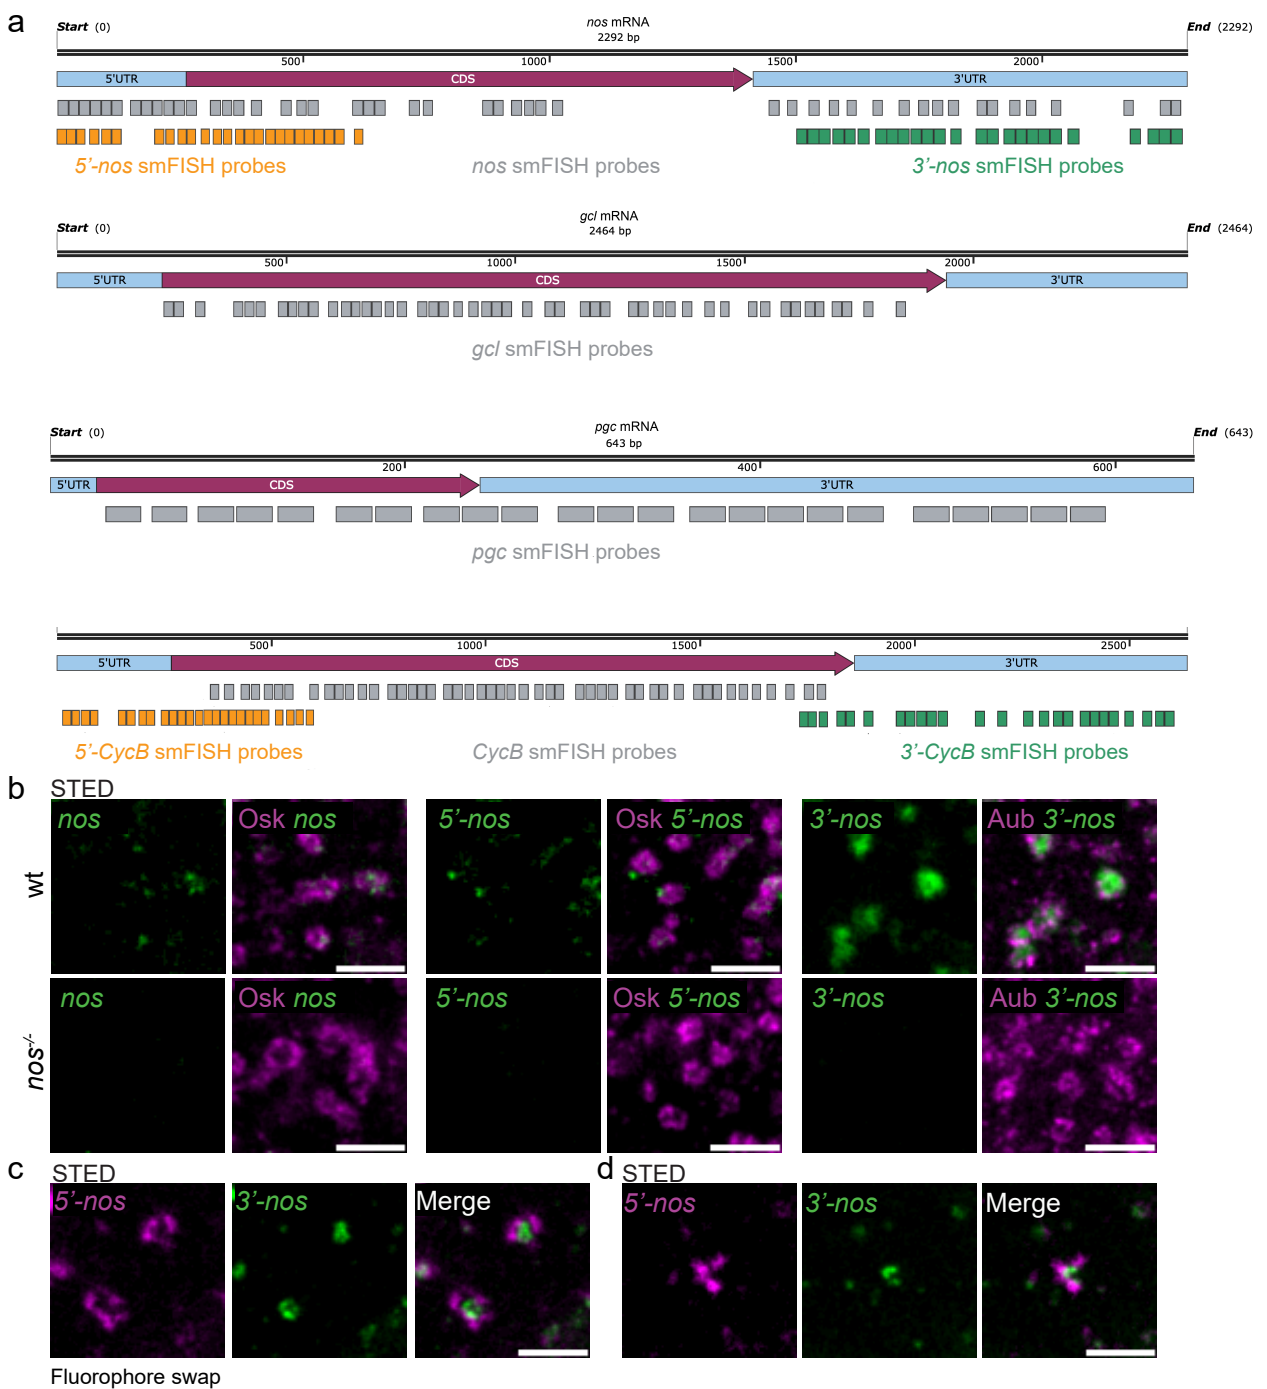

**Supplementary Figure 4/ Schematic representation and validation of smFISH probes.** **a**, The boxes represent oligos composing the probes. Grey boxes indicate probes covering full length mRNAs or coding sequences; orange boxes indicate probes covering mRNA 5'ends; and green boxes indicate probes covering mRNA 3'ends. **b**, STED imaging of immuno-smFISH of wild-type (top) and *nos*<sup>BN</sup> (bottom) embryos with anti-Osk or anti-Aub antibodies (magenta) and *nos*, *5'-nos* or *3'-nos* smFISH probes (green) showing the lack of signals with each *nos* probe in *nos*<sup>BN</sup> mutant embryos. **c**, **d**, STED images of smFISH of wild-type embryos with *5'-nos* (magenta) and *3'-nos* (green) probes where fluorophores associated with the probes have been swapped compared to images shown in Fig. 5a. Example of a granule in which three *nos* mRNA molecules are visible with both the *5'-nos* and *3'-nos* probes (**d**). Scale bars: 1  $\mu$ m.

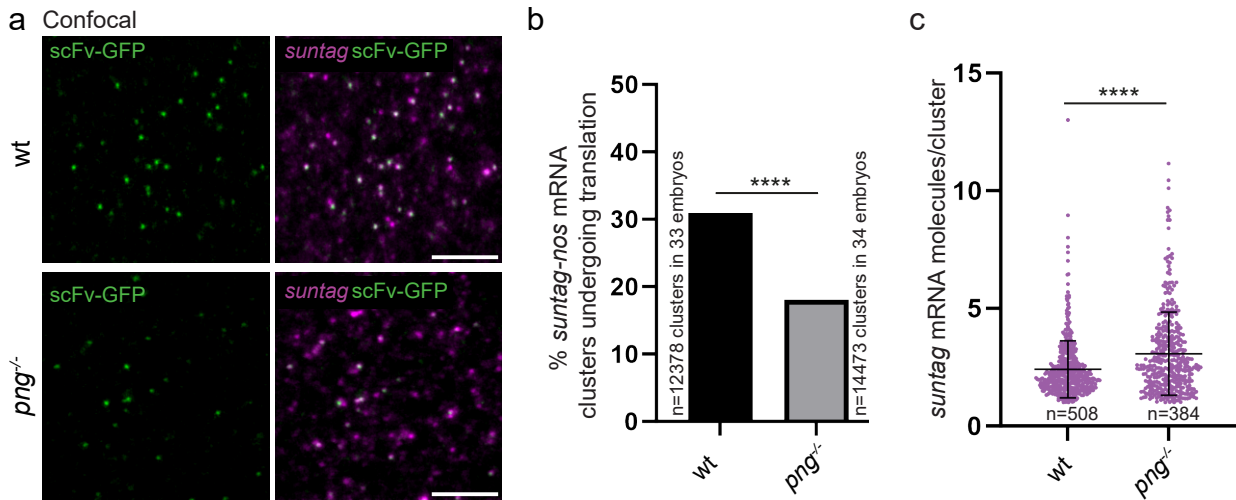

**Supplementary Figure 5/ Decrease of translation in *png* mutant embryos.** **a**, Fluorescent confocal imaging of smFISH on *nos-suntag-nos/+; nos-scFv-GFP/+* (wt) and *png*<sup>1058</sup>; *nos-suntag-nos* /+; *nos-scFv-GFP/+* (*png*<sup>-/-</sup>) embryos, showing scFv-GFP (green) and *suntag-nos* mRNA (magenta). **b**, Percentage of *suntag-nos* mRNA clusters undergoing translation in *nos-suntag-nos/+; nos-scFv-GFP/+* (wt) and *png*<sup>1058</sup>; *nos-suntag-nos* /+; *nos-scFv-GFP/+* (*png*<sup>-/-</sup>) embryos. The graph represents the percentage of *suntag-nos* mRNA clusters colocalizing with scFv-GFP foci from images as in (a). \*\*\*\*  $p < 0.0001$  using the  $\chi^2$  test.  $p = 1.6 \times 10^{-133}$ . **c**, Quantification using FISH-quant of the number of *suntag-nos* mRNA molecules per cluster at the posterior pole from confocal images of smFISH on *nos-suntag-nos/+; nos-scFv-GFP/+* (wt) and *png*<sup>1058</sup>; *nos-suntag-nos* /+; *nos-scFv-GFP/+* (*png*<sup>-/-</sup>) embryos as shown in (a). Horizontal bars represent the mean and SD. \*\*\*\*  $p < 0.0001$  using the unpaired two-tailed Student's t-test.  $p = 4.2 \times 10^{-11}$ . The number of mRNA clusters is indicated (n). Scale bars: 5  $\mu$ m. Source data are provided as a Source Data file.

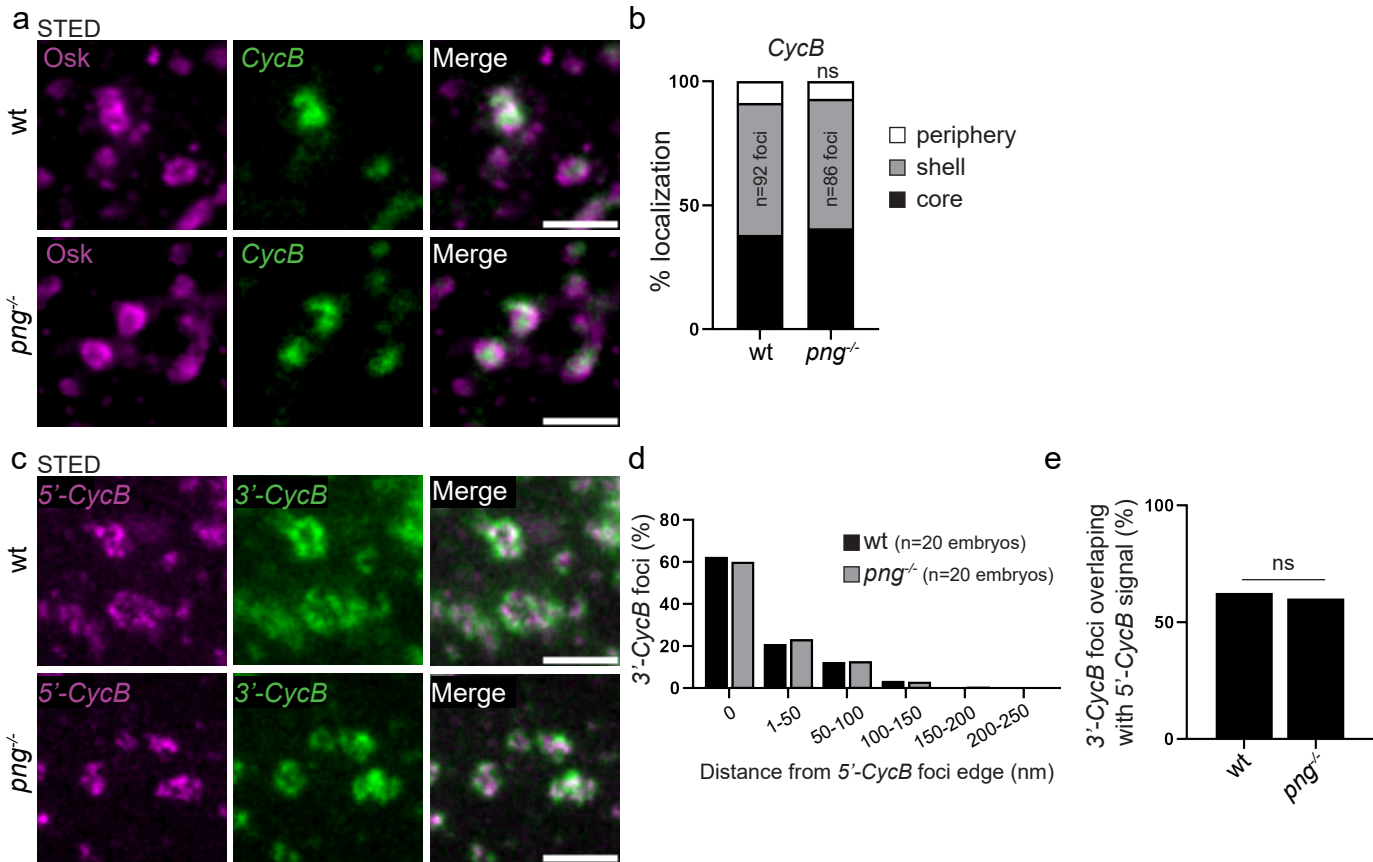

**Supplementary Figure 6/ *CycB* mRNA localization and compaction are not affected in *png* mutant embryos.**

**a**, STED imaging of immuno-smFISH of wild-type and *png*<sup>1058</sup> mutant (*png*<sup>-/-</sup>) embryos with anti-Osk antibody and *CycB* smFISH probe. **b**, Percentage of localization of *CycB* mRNA foci in wild-type and *png*<sup>1058</sup> mutant embryos, in the core (black), in the shell (grey) and at the immediate periphery (white) of germ granules from images as in (a). ns: non-significant using the  $\chi^2$  test.  $p=0.88$ . **c**, STED images of smFISH against *CycB* 5'end (5'-*CycB*, magenta) and 3'end (3'-*CycB*, green) in wild-type and *png*<sup>1058</sup> mutant embryos. **d**, Measurement of the distance between *CycB* 3'end foci and the edge of *CycB* 5'end foci in wild-type and *png*<sup>1058</sup> embryos from images as in (c). The histogram shows the percentage of *CycB* 3'end foci in each distance class. **e**, Percentage of *CycB* 3'end foci overlapping with *CycB* 5'end foci in wild-type and *png*<sup>1058</sup> embryos. ns: non-significant using the  $\chi^2$  test.  $p=0.09$ . Scale bars: 1  $\mu$ m. Source data are provided as a Source Data file.

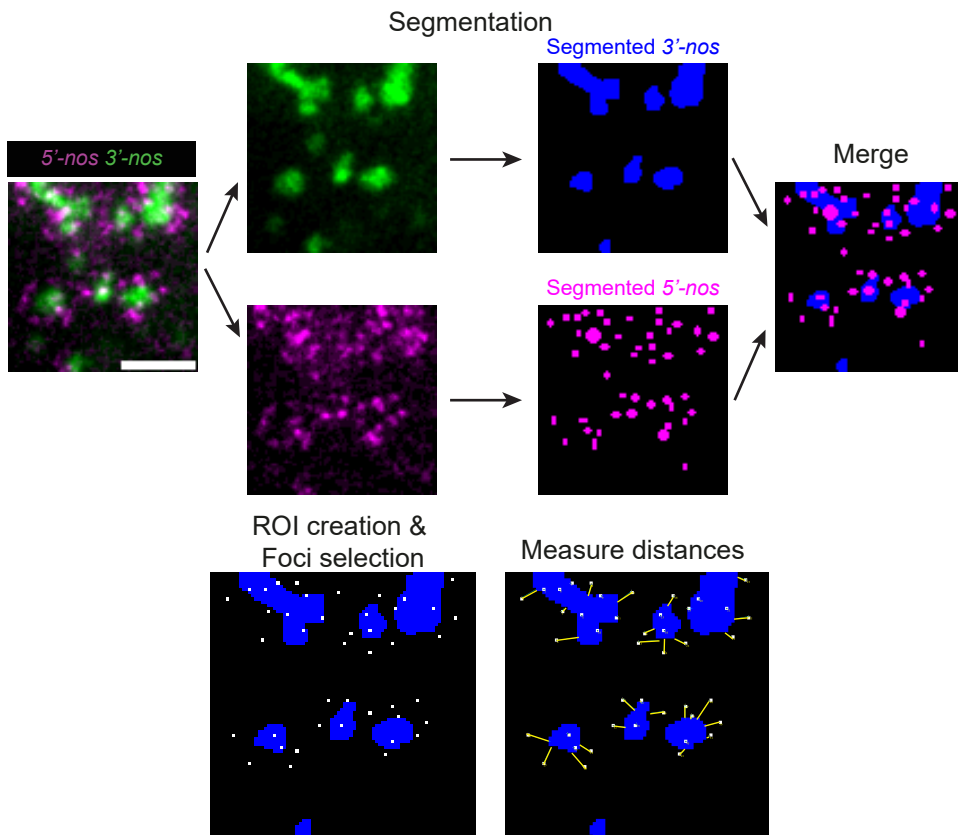

**Supplementary Figure 7/ Illustration of the method to measure the distance between 5'end and 3'end smFISH probes.** The most internal signal, here 3'-nos in green, was segmented to define regions of interest (ROI) that corresponded to the area of the probe signal. The signal from 5'-nos smFISH probes in magenta was segmented as foci. The distance between the edge of the ROI defined by 3'-nos and the center of 5'-nos foci was then measured. When 5'-nos foci were within 3'-nos ROI, the measured distance was 0 (overlapping foci).



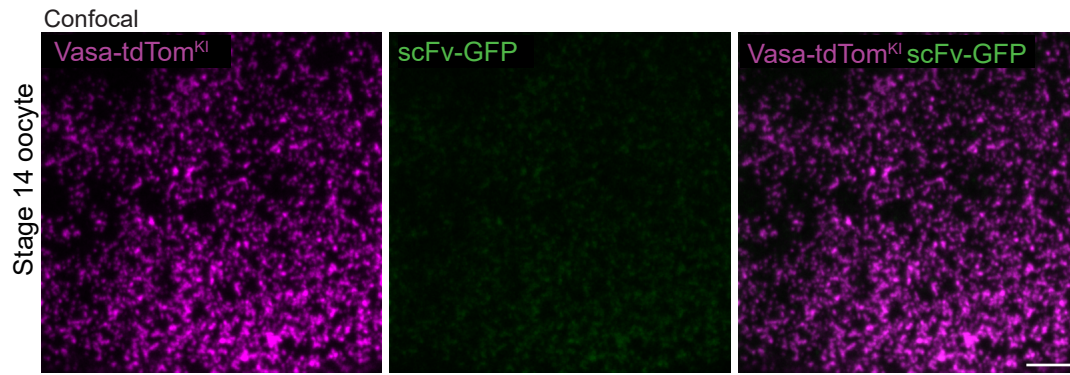

**Supplementary Figure 8/ *suntag-nos* is not translated in stage 14 oocytes.** Confocal image of *vasa-tdTom<sup>KI</sup>/nos-suntag-nos; nos-scFv-GFP/+* stage 14 oocyte germ plasm. GFP and tdTomato were recorded without antibody staining. The GFP fluorescence was absent in 100% of stage 14 oocytes (n=14). Scale bar: 5  $\mu$ m.

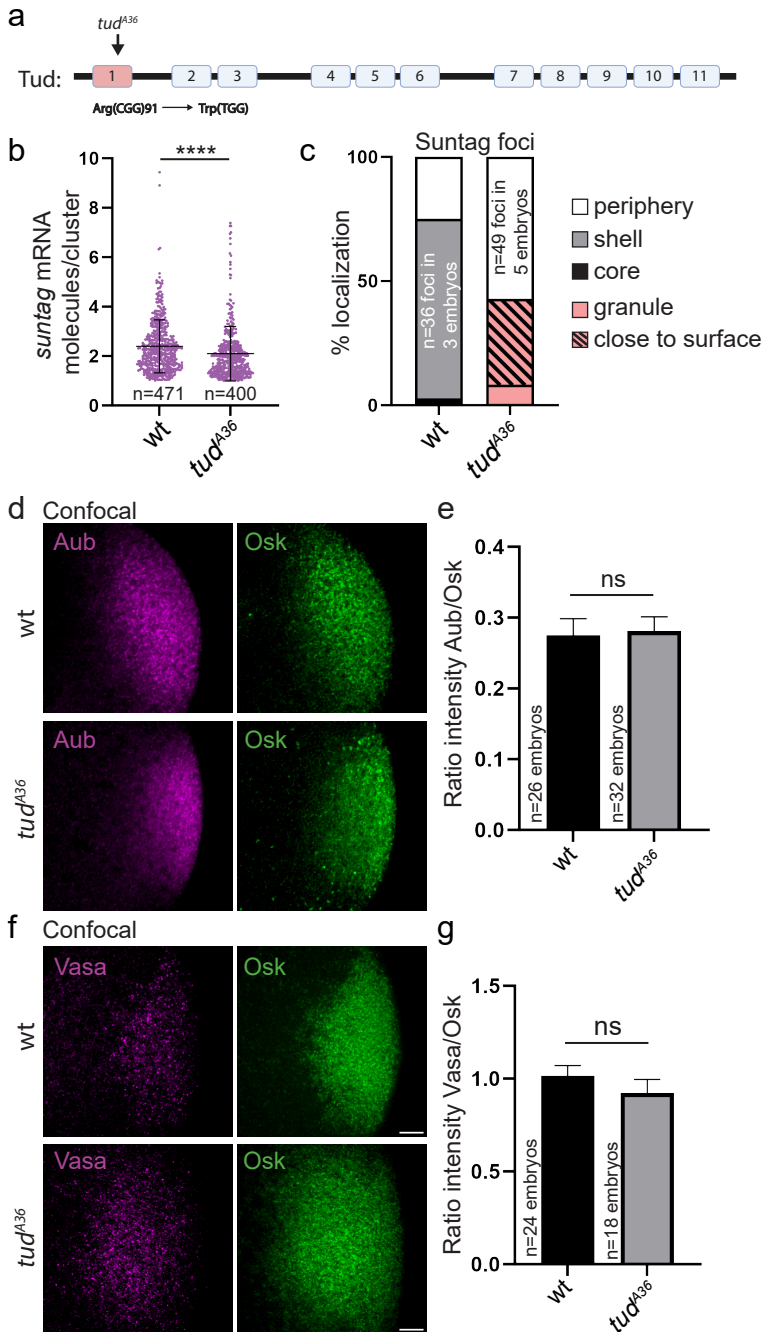

**Supplementary Figure 9/ Characterization of germ granule content in *tud<sup>A36</sup>* mutant.**

**a**, Schematic representation of Tud protein and the point mutation in *tud<sup>A36</sup>* mutant. Boxes represent the eleven Tudor domains. The mutation in *tud<sup>A36</sup>* is in the first Tudor domain. **b**, Quantification using FISH-quant of the number of *suntag-nos* mRNA molecules per cluster at the posterior pole from confocal images of smFISH on *nos-suntag-nos/+; nos-scFv-GFP/+* (wt) and *nos-suntag-nos tud<sup>A36</sup>/Df(2R)Pu<sup>rP133</sup>; nos-scFv-GFP/+* (*tud<sup>A36</sup>*) embryos from images as in Fig. 7c. Horizontal bars represent the mean and SD. \*\*\*\*  $p < 0.0001$  using the unpaired two-tailed Student's t-test.  $p = 4.4 \times 10^{-5}$ . The number of mRNA clusters is indicated (n). **c**, Percentage of scFv-GFP foci in *nos-suntag-nos/+; nos-scFv-GFP/+* (wild-type) and *nos-suntag-nos tud<sup>A36</sup>/Df(2R)Pu<sup>rP133</sup>; nos-scFv-GFP/+* (*tud<sup>A36</sup>*) embryos, localized in the core (black), the shell (grey) and at the immediate periphery (white) of wild-type germ granules, and in the monophasic germ granule (pink) and at their immediate periphery (white) in *tud<sup>A36</sup>* embryos. The striped pink rectangle represents the percentage of scFv-GFP foci within 50 nm of the granule surface. **d**, Confocal images of immunostaining of wild-type (wt) and *tud<sup>A36</sup>/Df(2R)Pu<sup>rP133</sup>* (*tud<sup>A36</sup>*) embryos with anti-Aub (magenta) and anti-Osk (green) antibodies. **e**, Quantification of Aub protein levels (signal intensity) normalized to Osk levels. ns: non-significant using the unpaired two-tailed Student's t-test.  $p = 0.85$ . **f**, Confocal images of immunostaining of wild-type (wt) and *tud<sup>A36</sup>/Df(2R)Pu<sup>rP133</sup>* (*tud<sup>A36</sup>*) embryos with anti-Vasa (magenta) and anti-Osk (green) antibodies. **g**, Quantification of Vasa protein levels (signal intensity) normalized to Osk levels. ns: non-significant using the unpaired two-tailed Student's t-test.  $p = 0.32$ . Scale bars: 10  $\mu\text{m}$ . Source data are provided as a Source Data file.

## **Supplementary Note**

### ***Imaging germ granule core/shell organization***

*Drosophila* embryos have an ovoid shape and the germ plasm is only accessible by imaging deep into the sample, which decreases resolution. Therefore, to reach the resolution required to resolve germ granule organization, the distance between the sample and the objective had to be reduced. This was achieved using two approaches: 1) either optimizing the mounting of embryos such that the posterior pole was directly facing the coverslip, or 2) slicing the posterior of embryos. In the first approach, embryos were mounted in a high concentration, making embryos pile up one upon another. Only embryos with the posterior pole facing up were imaged. In the second approach, the posterior of embryos was sliced using a needle and mounted with the posterior side up (Extended Data Fig. 1a). Both approaches led to a level of resolution allowing to reveal germ granule structure. The requirement of these mounting methods was illustrated by imaging germ granule using the Airyscan system. This is a confocal laser scanning set up where an array of detectors allows the improvement of resolution up to 120 nm, giving super-resolution-like images. Using whole mount embryos, we could not observe germ granule core/shell organization (Extended Data Fig. 1c, top). However, using sliced posterior poles, we easily observed GFP-Aub donut-like shapes, even with GFP fluorescence, in the absence of antibody staining (Extended Data Fig. 1c, bottom). The germ granule core/shell architecture was observed using three different microscopy techniques, STED, Airyscan and OMX, with and without antibody staining, establishing this biphasic organization.

**Supplementary Table 1. List of smFISH probes to detect the *suntag* sequence**

| Probe sequence       | Probe Name |
|----------------------|------------|
| ggtgtagtcttgcctcag   | suntag 1   |
| ctacccttctcagctcgg   | suntag 2   |
| gctcaaaagtcttcaccg   | suntag 3   |
| gccacttcggtcctcaagat | suntag 4   |
| gccagaaccttcttaaga   | suntag 5   |
| tgaagcagcttcttcca    | suntag 6   |
| tcattttccagggtgta    | suntag 7   |
| cccttttcagctagcta    | suntag 8   |
| atftttgctcagaactcc   | suntag 9   |
| tgctacttcggttccaaa   | suntag 10  |
| atccggaccttctttag    | suntag 11  |
| tcgagagtaactcctcacc  | suntag 12  |
| gccacttcggttcgagat   | suntag 13  |
| accactgcccttttttagc  | suntag 14  |
| agataatagctcttcca    | suntag 15  |
| atfttcgaggtgtagttt   | suntag 16  |
| ctttttaagcgtgccacc   | suntag 17  |
| accactgccactagactt   | suntag 18  |
| attcttgatagtagctct   | suntag 19  |
| gctacctcgttcaagat    | suntag 20  |
| ccggaaccttctcaaac    | suntag 21  |
| agttcttcgagagcagttc  | suntag 22  |
| gcgacctcatttcaagat   | suntag 23  |
| cccgatccctttttaatc   | suntag 24  |
| gaaagtagtctcaccac    | suntag 25  |
| cttcgfttcgaggtgta    | suntag 26  |
| ccctgaaccttctttaat   | suntag 27  |
| actcagtaattctcacc    | suntag 28  |
| gctacctcatttccagat   | suntag 29  |
| aacctccccttttttag    | suntag 30  |
| ttcgatagcaattcctcgc  | suntag 31  |
| agcaactcgttctcaaga   | suntag 32  |
| taccagagccccttttgag  | suntag 33  |
| tacttagtaattcctcacc  | suntag 34  |
| cttgctacttcattctcta  | suntag 35  |
| gagcctgagccccttttta  | suntag 36  |

**Supplementary Table 2. List of smFISH probes to detect *nos* 5'end (5'-*nos*)**

| Probe sequence      | Probe Name |
|---------------------|------------|
| aagctacgcgccaactaa  | 5'-nos 1   |
| ttccaggaattttgtggt  | 5'-nos 2   |
| aactgcgaagcgtacggc  | 5'-nos 3   |
| tcgtatgtcccttagaca  | 5'-nos 4   |
| aatcgtgacgcagaggca  | 5'-nos 5   |
| ctaaactcgctttgggt   | 5'-nos 6   |
| ccacaaatcctcacccaa  | 5'-nos 7   |
| ggttatcgcgcactctac  | 5'-nos 8   |
| ggcgaaaatccgggtcga  | 5'-nos 9   |
| ccaagttgctgcggaca   | 5'-nos 10  |
| aagttatctgctgctgcg  | 5'-nos 11  |
| cctcctctggcgtgaaaa  | 5'-nos 12  |
| tgcaggcccagaatgttg  | 5'-nos 13  |
| cccactggtatccaaata  | 5'-nos 14  |
| aagtggccgacgagttgg  | 5'-nos 15  |
| ggcgtaatggcggactc   | 5'-nos 16  |
| agacgtcgcgggtcagg   | 5'-nos 17  |
| ggaagtgcgtcactgctg  | 5'-nos 18  |
| gctgtgtcggccagaaaa  | 5'-nos 19  |
| ggagcgaattggcgggtgg | 5'-nos 20  |
| tggtactgtcgtgcata   | 5'-nos 21  |
| tgctggagcagcaagtgg  | 5'-nos 22  |
| catggccagttgctgctg  | 5'-nos 23  |
| cagcccaattggtgctg   | 5'-nos 24  |
| tttctggtgactcgcac   | 5'-nos 25  |

**Supplementary Table 3. List of smFISH probes to detect *nos* 3'end (3'-*nos*)**

| Probe sequence         | Probe Name |
|------------------------|------------|
| tctatctatctggtaaccag   | 3'-nos 1   |
| caggcgctattaaacgtfact  | 3'-nos 2   |
| aatctctttaaatacgaacgcg | 3'-nos 3   |
| aagatctataggcacgggataa | 3'-nos 4   |
| tgatcgttcgtgtctatacta  | 3'-nos 5   |
| ttctgaattattgacttgat   | 3'-nos 6   |
| caaaattagttcccttcaca   | 3'-nos 7   |
| acgatattgfaagtcttctta  | 3'-nos 8   |
| gccacgacgattgaacaagtat | 3'-nos 9   |
| ttcggattgtaagatattcta  | 3'-nos 10  |
| cagaccaattccattcatcaac | 3'-nos 11  |
| tttacgaaatgaaggcgaccag | 3'-nos 12  |
| atatacgaattttcggccg    | 3'-nos 13  |
| attcaaagtgtccttttcaa   | 3'-nos 14  |
| aatgatacgttgacagttcga  | 3'-nos 15  |
| tccttagcaagattaaattt   | 3'-nos 16  |
| cgacgaaagtgtccttgctat  | 3'-nos 17  |
| atfttacaatgaatgcgtagcc | 3'-nos 18  |
| agtgcggaatgcaaaatttaa  | 3'-nos 19  |
| atactctcgttatctatcaa   | 3'-nos 20  |
| gtgttgaaatgaatacttgcca | 3'-nos 21  |
| aattatataatgctggcggttg | 3'-nos 22  |
| tcagaatatgtgtacacatttt | 3'-nos 23  |
| tcgagccattgaattttcatt  | 3'-nos 24  |
| tgtaaccatttcttatttggc  | 3'-nos 25  |

**Supplementary Table 4. List of smFISH probes to detect *cycB* 5'end (5'-*cycB*)**

| Probe sequence     | Probe name         |
|--------------------|--------------------|
| gctgccgttgaattga   | 5'- <i>cycB</i> 1  |
| ttgcacacgaagcgaggc | 5'- <i>cycB</i> 2  |
| ctccgaaaacctgatcga | 5'- <i>cycB</i> 3  |
| tcgagtgcgggattgtca | 5'- <i>cycB</i> 4  |
| cgcttgtttagctgttga | 5'- <i>cycB</i> 5  |
| gatcgcgttctgtgacc  | 5'- <i>cycB</i> 6  |
| ggctatcacttggttgg  | 5'- <i>cycB</i> 7  |
| cgaagataggcagacgct | 5'- <i>cycB</i> 8  |
| tgttctttctatctgt   | 5'- <i>cycB</i> 9  |
| ttgtgccaccatttga   | 5'- <i>cycB</i> 10 |
| atgccacgcatttcag   | 5'- <i>cycB</i> 11 |
| agttctccgaagcgttct | 5'- <i>cycB</i> 12 |
| tcttcaattgcacttgct | 5'- <i>cycB</i> 13 |
| ccatggaaggaaccgtca | 5'- <i>cycB</i> 14 |
| gcgcgtttgggttgcc   | 5'- <i>cycB</i> 15 |
| ctgcaaatcgccaaggc  | 5'- <i>cycB</i> 16 |
| gacgactatgcccgat   | 5'- <i>cycB</i> 17 |
| gcaccttcgctcgatg   | 5'- <i>cycB</i> 18 |
| ccttgagctttctgtg   | 5'- <i>cycB</i> 19 |
| gcgtctgtgagcttgaga | 5'- <i>cycB</i> 20 |
| agcttggcattgcgcag  | 5'- <i>cycB</i> 21 |
| agtggctgttctccag   | 5'- <i>cycB</i> 22 |
| cattgccattgccattgg | 5'- <i>cycB</i> 23 |
| ttgaccttggcggaacg  | 5'- <i>cycB</i> 24 |
| aaaaacccgacacgcc   | 5'- <i>cycB</i> 25 |

**Supplementary Table 5. List of smFISH probes to detect *cycB* 3'end (3'-*cycB*)**

| Probe sequence         | Probe name |
|------------------------|------------|
| ttcagcttggcctgaggag    | 3'-cycB 1  |
| ggfactgtttagatggc      | 3'-cycB 2  |
| gcgatcttctggaactgc     | 3'-cycB 3  |
| acaatcgagtccatcagcg    | 3'-cycB 4  |
| tattcctctggctctggc     | 3'-cycB 5  |
| aaactaggaagtcagggtct   | 3'-cycB 6  |
| cgcatttttaacgaacacga   | 3'-cycB 7  |
| gcaatgcgactacggtaacta  | 3'-cycB 8  |
| atgggtgatgcaggtaaagat  | 3'-cycB 9  |
| ccagcagattacgatctta    | 3'-cycB 10 |
| agtagccgaaaactgctcaag  | 3'-cycB 11 |
| tagtcttaccggaggaaactca | 3'-cycB 12 |
| gagatggtgaccagcgaaaag  | 3'-cycB 13 |
| aaatgaactcgttcccactc   | 3'-cycB 14 |
| aattcttggagagacaacgcc  | 3'-cycB 15 |
| tgaatgattcacgggtaca    | 3'-cycB 16 |
| attagtgataggtaggtaggg  | 3'-cycB 17 |
| tattcattccatcgaacta    | 3'-cycB 18 |
| atfttgacaatttttgat     | 3'-cycB 19 |
| ttttatgcgatttatgggaat  | 3'-cycB 20 |
| ttacaaatagtctacgtctct  | 3'-cycB 21 |
| tgttttgtatgaatgtgcga   | 3'-cycB 22 |
| tttaaatcgttgcttagtggt  | 3'-cycB 23 |
| tttggaaacatcagttagtt   | 3'-cycB 24 |
| tctatgtattgtcagagaca   | 3'-cycB 25 |
