# Supplementary material for: Spatial organization of translation and translational repression in two phases of germ granules
Source: PubMed Central journal article supplement — Nat Commun. 2024 Sep 13;15:8020. doi: 10.1038/s41467-024-52346-x (PMC11399267; doi:10.1038/s41467-024-52346-x), 2024-09-13
Supplement: 41467_2024_52346_MOESM2_ESM.pdf [file 41467_2024_52346_MOESM2_ESM.pdf]

## Peer Review File

---

Spatial organization of translation and translational repression in two phases of germ granules

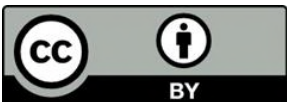

**Open Access** This file is licensed under a Creative Commons Attribution 4.0 International License, which permits use, sharing, adaptation, distribution and reproduction in any medium or format, as long as you give appropriate credit to the original author(s) and the source, provide a link to the Creative Commons license, and indicate if changes were made. In the cases where the authors are anonymous, such as is the case for the reports of anonymous peer reviewers, author attribution should be to 'Anonymous Referee' followed by a clear attribution to the source work. The images or other third party material in this file are included in the article's Creative Commons license, unless indicated otherwise in a credit line to the material. If material is not included in the article's Creative Commons license and your intended use is not permitted by statutory regulation or exceeds the permitted use, you will need to obtain permission directly from the copyright holder. To view a copy of this license, visit <http://creativecommons.org/licenses/by/4.0/>.

---

**Editorial Note:** This manuscript has been previously reviewed at another journal that is not operating a transparent peer review scheme. This document only contains reviewer comments and rebuttal letters for versions considered at *Nature Communications*. Mentions of the other journal have been redacted.

---

## **REVIEWERS' COMMENTS**

### **Reviewer #1 (Remarks to the Author):**

As I have already stated (during the first round of reviews), this is an important paper describing 1. translation of Nanos RNA on the surface of germ granules in *Drosophila* and 2. In situ and genetic analyses that correlate granule architecture to RNA translational status. The authors have revised this paper extensively since its original submission and have done a great job addressing the reviewers' comments. The manuscript is ready for publication.

[REDACTED].
